# Supplementary material
Source: PubMed Central journal article supplement (PMC1270953)
Supplement: nar_33_18_e163__1.pdf [file nar_33_18_e163__1.pdf]

**Table 1S** Primers used for vector construction

| <b>Primer name</b>                  | <b>Sequence (5' – 3')</b>                                                                       |
|-------------------------------------|-------------------------------------------------------------------------------------------------|
| HIS5 CRG.F <sup>a</sup>             | CCGCAGAGCAGATTGTA <b>CT</b> ACTGAGAGTGCACCACGCTTTTCACGTACGT<br><b>CTTGTACTGTCTTTTCGCCGAAACC</b> |
| HIS5 CRG.R <sup>a</sup>             | TTCGATGATAAGCTGTCAAACATGAGAATTGGTCGACGCACGTACGTT<br><b>GGGTTGGCCATGAATACG</b>                   |
| HIS5 up BsiWI-17.F <sup>a</sup>     | AAAATAGGCGTATCACGAGGCCCTTTCGTCTTCAAGAATTCGTACGTC<br><b>TTGTACTGTCTTTTCGCCGAAACC</b>             |
| HIS5 down BsiWI-2064.R <sup>a</sup> | CAGTTGGACGATCGATGATAAGCTGTCAAACATGAGAATTCGTACGTT<br><b>GGGTTGGCCATGAATACG</b>                   |
| URA3 CRG.F <sup>b</sup>             | CTTCAAAAATAGACAAGACGAAAAAACGGTGAAAATGGGTGACGTCATA<br><b>ACTGATATAATTAATTGAAGC</b>               |
| URA3 CRG.R <sup>b</sup>             | CTCCCCGCGGTTGGCCGATTCATTAATGCAGGCCCGGGCGACGTC<br><b>GGATCCTCTAGAGTCGACCTGCAGG</b>               |

<sup>a</sup>Sequences with homology to HIS5 are shown in bold.<sup>b</sup>Sequences with homology to URA3 are shown in bold.**Table 2S** Cloning primers used for the standard cloning method

| <b>Gene</b>    | <b>Primer name</b> | <b>Sequence (5' – 3')</b>                                                     |
|----------------|--------------------|-------------------------------------------------------------------------------|
| <i>aex-3</i>   | aex-3 up.F         | ATCCGTCCTAAGAAACCATTATTATCATGACAGCGGCCGCGGT<br><b>ACCATTCTTGAATTGAAACTCG</b>  |
|                | aex-3 up.R         | <b>CCGCCAAAATAATATCGGGGAAGG</b>                                               |
|                | aex-3 down.F       | <b>AAATGTTGTGGGCGTAGAAGCTATTC</b>                                             |
|                | aex-3 down.R       | AAGCGTGGTGCACCTCTCAGTACAATCTGCTCTGCGGCCGCTTG<br><b>GATGGCTCTGGGATTTGTAG</b>   |
| <i>bar-1</i>   | bar-1 up.F         | ATCCGTCCTAAGAAACCATTATTATCATGACAGCGGCCGCTGG<br><b>CCAAGACCATTTATCAATTGTGG</b> |
|                | bar-1 up.R         | <b>TGTAGAAACATACATCACGAAACC</b>                                               |
|                | bar-1 down.F       | <b>CAAATACACTAATTTCTGTTTGCCAGC</b>                                            |
|                | bar-1 down.R       | AAGCGTGGTGCACCTCTCAGTACAATCTGCTCTGCGGCCGCGTT<br><b>TGCGGTTATGGATCAACTGG</b>   |
| <i>C02H7.1</i> | C02H7.1 up.F       | ATCCGTCCTAAGAAACCATTATTATCATGACAGCGGCCGCTTTT<br><b>CCTGGAACAGGCACTGGGG</b>    |
|                | C02H7.1 up.R       | <b>TCTTTTCGACAGACGCTCAACTCC</b>                                               |
|                | C02H7.1 down.F     | <b>TCTAGATTGGCCATATTTCTAGTGTCC</b>                                            |
|                | C02H7.1 down.R     | AAGCGTGGTGCACCTCTCAGTACAATCTGCTCTGCGGCCGCTTG<br><b>GGTAATGCCTCAAACCTCC</b>    |
| <i>che-2</i>   | che-2 up.F         | ATCCGTCCTAAGAAACCATTATTATCATGACAGCGGCCGCTTAT<br><b>TGTTACCCACTAAACATCCG</b>   |
|                | che-2 up.R         | <b>ATTAGGTAAGCATATCTCCGTAGC</b>                                               |
|                | che-2 down.F       | <b>CCTTATAGCTCAGTGGTAGAGCG</b>                                                |
|                | che-2 down.R       | AAGCGTGGTGCACCTCTCAGTACAATCTGCTCTGCGGCCGCAAA<br><b>CGTTTGGTATAGAATTACCGC</b>  |
| <i>col-19</i>  | col-19 up.F        | ATCCGTCCTAAGAAACCATTATTATCATGACAGCGGCCGCTCC<br><b>ACTTTGAAAGAGTATAGCTCGG</b>  |
|                | col-19 up.R        | <b>CCTTCTACGTTCCAATTGATGTGG</b>                                               |
|                | col-19 down.F      | <b>GAACTGCTGGTTAGCAATCTCCGAGC</b>                                             |
|                | col-19 down.R      | AAGCGTGGTGCACCTCTCAGTACAATCTGCTCTGCGGCCGCGCT<br><b>CACTTTTGTGCTTCTAGCGGG</b>  |
| <i>daf-3</i>   | daf-3 up.F         | ATCCGTCCTAAGAAACCATTATTATCATGACAGCGGCCGCGCA<br><b>AACAGCCAGATTTGATGGCC</b>    |
|                | daf-3 up.R         | <b>TCGTTTTCATGTTTTTCAACAATCCCG</b>                                            |
|                | daf-3 down.F       | <b>CCATTTCTTAACTCTGTTTATGTCCGC</b>                                            |
|                | daf-3 down.R       | AAGCGTGGTGCACCTCTCAGTACAATCTGCTCTGCGGCCGCGCTA<br><b>TAGTTCCGGAGATCAAGGTGG</b> |

|                 |                 |                                                                                 |
|-----------------|-----------------|---------------------------------------------------------------------------------|
| <i>F13C5.1</i>  | F13C5.1 up.F    | ATCCGTCCTAAGAAACCATTATTATCATGACAGCGGCCGCAGT<br><b>GTCCAGGTTTTGCTTGACATCGC</b>   |
|                 | F13C5.1 up.R    | <b>GTGATGCTCCGCTGAAGGTATTGG</b>                                                 |
|                 | F13C5.1 down.F  | <b>TAAATCTAAAGCTGCCATAGCGGC</b>                                                 |
|                 | F13C5.1 down.R  | AAGCGTGGTGCACCTCTCAGTACAATCTGCTCTGCGGCCGCAAA<br><b>AGGAACCGCACCCTATCCGG</b>     |
| <i>F13C5.2</i>  | F13C5.2 up.F    | ATCCGTCCTAAGAAACCATTATTATCATGACAGCGGCCGCCTA<br><b>GAAAGTTGTTTGATGCGAGACG</b>    |
|                 | F13C5.2 up.R    | <b>CTATTCAAGCTCGTAGTTTTCTGC</b>                                                 |
|                 | F13C5.2 down.F  | <b>CGCAATGTCAGCTGAAATATCTCG</b>                                                 |
|                 | F13C5.2 down.R  | AAGCGTGGTGCACCTCTCAGTACAATCTGCTCTGCGGCCGCCAC<br><b>TCATCCAGAGGAAGTACTCCG</b>    |
| <i>F28C10.2</i> | F28C10.2 up.F   | ATCCGTCCTAAGAAACCATTATTATCATGACAGCGGCCGCACA<br><b>GAAATAGTTGAATCGAGTATTGG</b>   |
|                 | F28C10.2 up.R   | <b>GCCTACATTGATGACAGAGTGTC</b>                                                  |
|                 | F28C10.2 down.F | <b>AAGGAGCATCAGATTTTCTGTGAACC</b>                                               |
|                 | F28C10.2 down.R | AAGCGTGGTGCACCTCTCAGTACAATCTGCTCTGCGGCCGCCTG<br><b>CTTTCTCTAAGTTTTCAAACGC</b>   |
| <i>F39H12.4</i> | F39H12.4 up.F   | ATCCGTCCTAAGAAACCATTATTATCATGACAGCGGCCGCGAC<br><b>AGTCCTGATGAGCATTTCGGTCTCC</b> |
|                 | F39H12.4 up.R   | <b>CATCTGCGTAAAGGGGCTTTGTGC</b>                                                 |
|                 | F39H12.4 down.F | <b>ACTTGTGTGTTGCTTATAAAGCTACCG</b>                                              |
|                 | F39H12.4 down.R | AAGCGTGGTGCACCTCTCAGTACAATCTGCTCTGCGGCCGCGAA<br><b>GACTTTCCACTTTCTGAATGTCG</b>  |
| <i>F56F10.1</i> | F56F10.1 up.F   | ATCCGTCCTAAGAAACCATTATTATCATGACAGCGGCCGCAAC<br><b>CCGCATTGACTTTAATTCTGC</b>     |
|                 | F56F10.1 up.R   | <b>AACCATCAACGAGCTTCTTACCG</b>                                                  |
|                 | F56F10.1 down.F | <b>CTTCATTGCGTTTTCTAATGGATTCCG</b>                                              |
|                 | F56F10.1 down.R | AAGCGTGGTGCACCTCTCAGTACAATCTGCTCTGCGGCCGCAAT<br><b>TATCCCGGCAACCTACCTCC</b>     |
| <i>F56F10.3</i> | F56F10.3 up.F   | ATCCGTCCTAAGAAACCATTATTATCATGACAGCGGCCGCGTTC<br><b>CAGAAGATTGCAAGAAAAGTGGAG</b> |
|                 | F56F10.3 up.R   | <b>GCACTACCATGACGAATTTAGCACTAC</b>                                              |
|                 | F56F10.3 down.F | <b>TAAAGATTGTGTGGTTAATGGCGC</b>                                                 |
|                 | F56F10.3 down.R | AAGCGTGGTGCACCTCTCAGTACAATCTGCTCTGCGGCCGCCGG<br><b>TACTTGTTACACAGAAACAGC</b>    |
| <i>F56F10.4</i> | F56F10.4 up.F   | ATCCGTCCTAAGAAACCATTATTATCATGACAGCGGCCGCATCA<br><b>ATTGCCGCGCACCTGATTAATGC</b>  |
|                 | F56F10.4 up.R   | <b>TCCATACCTTATCAACGGAAGTGC</b>                                                 |
|                 | F56F10.4 down.F | <b>TGATAGATGTTGACGAAGTATGAAGC</b>                                               |
|                 | F56F10.4 down.R | AAGCGTGGTGCACCTCTCAGTACAATCTGCTCTGCGGCCGCGTT<br><b>AACGTACCTGCTAGCCATACC</b>    |
| <i>fem-3</i>    | fem-3 up.F      | ATCCGTCCTAAGAAACCATTATTATCATGACAGCGGCCGCTGA<br><b>GGAGCGACCATGGTATTTCGATGG</b>  |
|                 | fem-3 up.R      | <b>TTCATCAAGTGTCAATTGTCTGTGG</b>                                                |
|                 | fem-3 down.F    | <b>AAATGGCTCGTGCTATTGCTATCG</b>                                                 |
|                 | fem-3 down.R    | AAGCGTGGTGCACCTCTCAGTACAATCTGCTCTGCGGCCGCTGG<br><b>AGCTCTTCTGGAGCTTCTGG</b>     |
| <i>gei-10</i>   | gei-10 up.F     | ATCCGTCCTAAGAAACCATTATTATCATGACAGCGGCCGCTACA<br><b>AGGTTTTCTGGGAGAAAATAAAGG</b> |
|                 | gei-10 up.R     | <b>GGATTAAGGATGTGAAAGTGCCC</b>                                                  |
|                 | gei-10 down.F   | <b>TCTCGAATTCTACACGCATTACTAGAGG</b>                                             |
|                 | gei-10 down.R   | AAGCGTGGTGCACCTCTCAGTACAATCTGCTCTGCGGCCGCTAG<br><b>CCATCGGAGTTCACAAAACC</b>     |
| <i>hsp-16.2</i> | hsp-16.2 up.F   | ATCCGTCCTAAGAAACCATTATTATCATGACAGCGGCCGCTCG<br><b>AGTTCTACAATGTTAATGAGGCC</b>   |
|                 | hsp-16.2 up.R   | <b>TCAACACCAGAACCACTACAACGG</b>                                                 |
|                 | hsp-16.2 down.F | <b>TTTGATCATCTATTTCAAACGTGTGC</b>                                               |
|                 | hsp-16.2 down.R | AAGCGTGGTGCACCTCTCAGTACAATCTGCTCTGCGGCCGCTCT                                    |

|                           |                 | <b>TCGTGGTAATTGAGTATCAGG</b>                                                                                          |
|---------------------------|-----------------|-----------------------------------------------------------------------------------------------------------------------|
| <i>ifc-2</i>              | ifc-2 up.F      | ATCCGTCCTAAGAAACCATTATTATCATGACAGCGGCCGCTGA                                                                           |
|                           | ifc-2 up.R      | <b>ACGTTAGAAAATTCGCTGAACTGG</b>                                                                                       |
|                           | ifc-2 down.F    | <b>AGCATGAGAACCCCAAATCTACG</b>                                                                                        |
|                           | ifc-2 down.R    | <b>ACACTGTCCCTTAGAGAAGATCACC</b><br>AAGCGTGGTGCACCTCTCAGTACAATCTGCTCTGCGGCCGCAAA<br><b>GTTCTAAGCCAATTCGCGG</b>        |
| <i>irk-2</i>              | irk-2 up.F      | ATCCGTCCTAAGAAACCATTATTATCATGACAGCGGCCGCTACC                                                                          |
|                           | irk-2 up.R      | <b>TTTATGTATATAAATTATCACC</b>                                                                                         |
|                           | irk-2 down.F    | <b>AGGTGGTCAGTGCGAATTTGGCG</b>                                                                                        |
|                           | irk-2 down.R    | <b>CCATTAACCTAAGATCCTACCTTCCG</b><br>AAGCGTGGTGCACCTCTCAGTACAATCTGCTCTGCGGCCGCGCA<br><b>AGTGTAAATGGGTATGAATAGCATG</b> |
| <i>let-60<sup>a</sup></i> | CEOP4472 up.F   | ATCCGTCCTAAGAAACCATTATTATCATGACAGCGGCCGCGAA                                                                           |
|                           | CEOP4472 up.R   | <b>CTTGAACACTCCTGTAGTCATCG</b>                                                                                        |
|                           | CEOP4472 down.F | <b>CAAACGCCTACATGTTTCATATCGG</b>                                                                                      |
|                           | CEOP4472 down.R | <b>AGCGCCCGAGTACGTCTGAGGAAGC</b><br>AAGCGTGGTGCACCTCTCAGTACAATCTGCTCTGCGGCCGCGG<br><b>GCCGTTTCTGGGAGTTTAAAGG</b>      |
| <i>let-756</i>            | let-756 up.F    | ATCCGTCCTAAGAAACCATTATTATCATGACAGCGGCCGCGCA                                                                           |
|                           | let-756 up.R    | <b>TATTCGTCCATTTAGTTTTCC</b>                                                                                          |
|                           | let-756 down.F  | <b>ATCAGTTTGGAGGTATCAGTTGGG</b>                                                                                       |
|                           | let-756 down.R  | <b>ACAAGACTCCAAAATAACAGAGATGGC</b><br>AAGCGTGGTGCACCTCTCAGTACAATCTGCTCTGCGGCCGCACC<br><b>TCATGCTTGCCATAAAGGCC</b>     |
| <i>mab-7</i>              | mab-7 up.F      | ATCCGTCCTAAGAAACCATTATTATCATGACAGCGGCCGCTTTA                                                                          |
|                           | mab-7 up.R      | <b>ATCGACAGCCTAGTTATCTCGC</b>                                                                                         |
|                           | mab-7 down.F    | <b>GAAGCCTTTTGTCTACTCGATAGC</b>                                                                                       |
|                           | mab-7 down.R    | <b>CACCTCCTAGGCTACAAATTATTCACA</b><br>AAGCGTGGTGCACCTCTCAGTACAATCTGCTCTGCGGCCGCGG<br><b>GGTCAAACGGTAAATAAAATGGATC</b> |
| <i>mes-6<sup>b</sup></i>  | CEOP4294 up.F   | ATCCGTCCTAAGAAACCATTATTATCATGACAGCGGCCGCAAC                                                                           |
|                           | CEOP4294 up.R   | <b>AAATAAGGAATTGTGACGACCC</b>                                                                                         |
|                           | CEOP4294 down.F | <b>GAAATGGAGCATCTCTTTGTGAGG</b>                                                                                       |
|                           | CEOP4294 down.R | <b>CAATACTCTATTGTTTAGATTTGAGC</b><br>AAGCGTGGTGCACCTCTCAGTACAATCTGCTCTGCGGCCGCAGA<br><b>TTTATAACTAAGCAGTTATGC</b>     |
| <i>mrp-1<sup>c</sup></i>  | mrp-1 up.F      | ATCCGTCCTAAGAAACCATTATTATCATGACAGCGGCCGCTCTA                                                                          |
|                           | mrp-1 up.R      | <b>ATCGGTATTGTGAGTCTGACACC</b>                                                                                        |
|                           | mrp-1 down.F    | <b>ATATGCTTGTGTGCGTAAGAGGG</b>                                                                                        |
|                           | mrp-1 down.R    | <b>TTTCACATTGGATTACTCGCAGAAGG</b><br>AAGCGTGGTGCACCTCTCAGTACAATCTGCTCTGCGGCCGCTAT<br><b>TCTTGTTTGCCTATGCGCGG</b>      |
| <i>nas-38</i>             | nas-38 up.F     | ATCCGTCCTAAGAAACCATTATTATCATGACAGCGGCCGCCATC                                                                          |
|                           | nas-38 up.R     | <b>GCTACACTGCACACAAAATGC</b>                                                                                          |
|                           | nas-38 down.F   | <b>ATCGTGGCGATTTCAAATCTATCC</b>                                                                                       |
|                           | nas-38 down.R   | <b>ACAATTCCGACCTTCTCACTTGGCG</b><br>AAGCGTGGTGCACCTCTCAGTACAATCTGCTCTGCGGCCGCTTC<br><b>AGGGTTTCTGAGGCTAGCGCG</b>      |
| <i>pqn-40</i>             | pqn-40 up.F     | ATCCGTCCTAAGAAACCATTATTATCATGACAGCGGCCGCTAG                                                                           |
|                           | pqn-40 up.R     | <b>AACCGTAGAGAGCCATTGGG</b>                                                                                           |
|                           | pqn-40 down.F   | <b>CGCGACCTCTTGGATGACAGAGC</b>                                                                                        |
|                           | pqn-40 down.R   | <b>CACACCACACGGTGTAACTATAGAAAGC</b><br>AAGCGTGGTGCACCTCTCAGTACAATCTGCTCTGCGGCCGCCAT<br><b>GGATTAATCCATTGCCGGG</b>     |
| <i>rol-6</i>              | rol-6 up.F      | ATCCGTCCTAAGAAACCATTATTATCATGACAGCGGCCGCCGA                                                                           |
|                           | rol-6 up.R      | <b>CTCGAAATGAAATATGATGGC</b><br><b>AAATTTAGTTCTCCTGAGGACACC</b>                                                       |

|                          |                                                                      |                                                                                                                                                                                                                                       |
|--------------------------|----------------------------------------------------------------------|---------------------------------------------------------------------------------------------------------------------------------------------------------------------------------------------------------------------------------------|
|                          | rol-6 down.F<br>rol-6 down.R                                         | <b>TTCCTTGTCAATTAATCACAACTGCG</b><br>AAGCGTGGTGCACCTCTCAGTACAATCTGCTCTGCGGCCGCCAA<br><b>ATTAGGGTCTCCAGAAGTCCG</b>                                                                                                                     |
| <i>skr-7</i>             | skr-7 up.F<br>skr-7 up.R<br>skr-7 down.F<br>skr-7 down.R             | ATCCGTCCTAAGAAACCATTATTATCATGACAGCGGCCGCCAG<br><b>CTTAATTGTGTTTAAACTCTACG</b><br><b>GTTCTCTCAACAACATTTATCGGC</b><br><b>GGTGTGTTTGGAGAAGTGAAGTGTCC</b><br>AAGCGTGGTGCACCTCTCAGTACAATCTGCTCTGCGGCCGCTAC<br><b>ACTTCTATCATAGATAATTCC</b> |
| <i>sli-1</i>             | sli-1 up.F<br>sli-1 up.R<br>sli-1 down.F<br>sli-1 down.R             | ATCCGTCCTAAGAAACCATTATTATCATGACAGCGGCCGCCAT<br><b>GACGCAAATAAACTTCAGTTCCG</b><br><b>TGTCACAAACTAAAGGTTAGTGC</b><br><b>TGCAAGGTGCTACAGCGTCTTCTGG</b><br>AAGCGTGGTGCACCTCTCAGTACAATCTGCTCTGCGGCCGCAGC<br><b>AACAACCGATCTGGAGCTCG</b>    |
| <i>T04G9.1</i>           | T04G9.1 up.F<br>T04G9.1 up.R<br>T04G9.1 down.F<br>T04G9.1 down.R     | ATCCGTCCTAAGAAACCATTATTATCATGACAGCGGCCCGGTTT<br><b>CTACACTTTCTGGCGTCGATGG</b><br><b>TACGACCTAACTAGGGAACCCCG</b><br><b>ATTGAAGGTTGCACTGACAAACGTCC</b><br>AAGCGTGGTGCACCTCTCAGTACAATCTGCTCTGCGGCCGCATG<br><b>ATGAAGATGAAGCCATCGGC</b>   |
| <i>T19D7.3</i>           | T19D7.3 up.F<br>T19D7.3 up.R<br>T19D7.3 down.F<br>T19D7.3 down.R     | ATCCGTCCTAAGAAACCATTATTATCATGACAGCGGCCCGCTTGA<br><b>CACCCGTTTGATGTGTAAGTGC</b><br><b>AGGCATGTTAAACTGATTGCGG</b><br><b>GTGATTTGAGTGAAAAGTGCCAAGC</b><br>AAGCGTGGTGCACCTCTCAGTACAATCTGCTCTGCGGCCGCTAG<br><b>CACTGTCATTCAAATCCATACG</b>  |
| <i>tra-2<sup>e</sup></i> | CEOP2268 up.F<br>CEOP2268 up.R<br>CEOP2268 down.F<br>CEOP2268 down.R | ATCCGTCCTAAGAAACCATTATTATCATGACAGCGGCCCGCTACC<br><b>AAACTGCCATAAATGTTGTGC</b><br><b>GATCGTTTCGGATCCAGAAATTCC</b><br><b>CGTCGGTTCATCAATGTTTCCACC</b><br>AAGCGTGGTGCACCTCTCAGTACAATCTGCTCTGCGGCCGCATC<br><b>CATTGAATGCAGAGATTGGCG</b>   |
| <i>unc-54</i>            | unc-54 up.F<br>unc-54 up.R<br>unc-54 down.F<br>unc-54 down.R         | ATCCGTCCTAAGAAACCATTATTATCATGACAGCGGCCCGCAATT<br><b>TAACCAGCATGTCAGTGTTCG</b><br><b>GTGCAGTCGTAGGGTTGTTATTGC</b><br><b>TAGATGAAGCATTAGGAAATGCCAGC</b><br>AAGCGTGGTGCACCTCTCAGTACAATCTGCTCTGCGGCCGCTGC<br><b>CCAACGGTTTGAGTATAGAGC</b> |

Sequences with homology to pCATCHR1 vector are shown in regular type; sequences that are homologous to the target worm gene are shown in bold.

<sup>a</sup>*let-60* is in operon CEOP4472.

<sup>b</sup>*mes-6* is in operon CEOP4294.

<sup>c</sup>*mrp-1* is the most upstream gene in operon CEOPX154. The downstream gene in the operon, *mrp-2*, was not subcloned.

<sup>e</sup>*tra-2* is in operon CEOP2268.

**Table 3S** Cloning primers used for the alternative cloning method

| Gene         | Primer name          | Sequence (5' – 3')                                                             |
|--------------|----------------------|--------------------------------------------------------------------------------|
| <i>bar-1</i> | bar-1 up.F           | ATCCGTCCTAAGAAACCATTATTATCATGACAGCGGCCCGCTGG<br><b>CCAAGACCATTTATCAATTGTGG</b> |
|              | CATCHR2 bar-1 up.R   | CAGTCGACTCGTCGTCGAGGCGAGCAAGTGTTTAGACGTTTGT<br><b>AGAAACATACATCACGAAACC</b>    |
|              | CATCHR2 bar-1 down.F | ACATTTCCCCGAAAAGTGCCACCTGACGTGCCCGGGCGATCAA<br><b>ATACACTAATTTGTTTGCCAGC</b>   |
|              | bar-1 down.R         | AAGCGTGGTGCACCTCTCAGTACAATCTGCTCTGCGGCCGCGTT<br><b>TGCGCGTTATGGATCAACTGG</b>   |

|                              |                            |                                                                                  |
|------------------------------|----------------------------|----------------------------------------------------------------------------------|
| <i>snr-1</i>                 | snr-1 up.F                 | ATCCGTCCTAAGAAACCATTATTATCATGACAGCGGCCGCGGA<br><b>CCAATATTTGATGCTGTATTCC</b>     |
|                              | CATCHR2 snr-1 up.R         | CAGTCGACTCGTCGTCGAGGCGAGCAAGTGTTTAGACGTTAA<br><b>CTGACGATCATTCTTCCCGG</b>        |
|                              | CATCHR2 snr-1<br>down.F    | ACATTTCCCGAAAAGTGCCACCTGACGTGCCCGGGCGATAAA<br><b>TGCTTGATTTTCCCGTTTTCG</b>       |
|                              | snr-1 down.R               | AAGCGTGGTGCACCTCTCAGTACAATCTGCTCTGCGGCCGCAG<br><b>CAATTCGTCATCACATCGACC</b>      |
| <i>tra-1<sup>a</sup></i>     | tra-1 up.F                 | ATCCGTCCTAAGAAACCATTATTATCATGACAGCGGCCGCTTAT<br><b>TGGTTACCCACTAAACATCCG</b>     |
|                              | CATCHR2-Srf tra-1<br>up.R  | CAGTCGACTCGTCGTCGAGGCGAGCAAGTGTTTAGACGTTGCC<br><b>CGGGCCTTGAGAAGGAAGAAAAAGTG</b> |
|                              | CATCHR2 tra-1<br>down.F    | ACATTTCCCGAAAAGTGCCACCTGACGTGCCCGGGCGATGAA<br><b>GTCTCGGTTCTGTATAGC</b>          |
|                              | tra-1 down.R               | AAGCGTGGTGCACCTCTCAGTACAATCTGCTCTGCGGCCGCAA<br><b>CGTTTGGTATAGAATTACCG</b>       |
| <i>Y87G2A.10<sup>b</sup></i> | CEOP1708 up.F              | ATCCGTCCTAAGAAACCATTATTATCATGACAGCGGCCGCTAC<br><b>ATTCTCCCGCTCTTTCAGATGG</b>     |
|                              | CATCHR2 CEOP1708<br>up.R   | CAGTCGACTCGTCGTCGAGGCGAGCAAGTGTTTAGACGTTTAG<br><b>CCAAGTAAGGTAGTCATGTGC</b>      |
|                              | CATCHR2 CEOP1708<br>down.F | ACATTTCCCGAAAAGTGCCACCTGACGTGCCCGGGCGATTCT<br><b>GAATTTTCACTAAAGTCGGGC</b>       |
|                              | CEOP1708<br>down.R         | AAGCGTGGTGCACCTCTCAGTACAATCTGCTCTGCGGCCGCAA<br><b>CTTCGGATGGATGTAACACGG</b>      |

Sequences with homology to pCATCHR1 or pCATCHR2 vectors are shown in regular type; sequences that are homologous to the target worm gene are shown in bold.

<sup>a</sup>the primer CATCHR2-Srf tra-1 up.R has an SrfI site, creating an intermediate targeting vector with an SrfI restriction site between the upstream target region boundary and pCATCHR2. SrfI linearization of the targeting vector results in a plasmid with free worm DNA ends and no flanking *URA3* marker.

<sup>b</sup>*Y87G2A.10* is in operon CEOP1708.

**Table 4S** Targeted tag primers used to amplify GF-URA3-FP

| Gene                       | Primer name          | Sequence (5' – 3')                                                                  |
|----------------------------|----------------------|-------------------------------------------------------------------------------------|
| <i>aex-3</i>               | aex-3 gfp tag N.F    | TTTGTCCAGGCTTGCACCAATGTACCTATCCTAATAAAAAA<br><b>TGAGTAAAGGAGAAGAACTTTTC</b>         |
|                            | aex-3 gfp tag N.R    | AGTCAATCAGACGAGGGCATATCTCTTTTTCTTTGTCATTT<br><b>TTGTATAGTTCATCCATGCCATG</b>         |
| <i>bar-1</i>               | bar-1 gfp tag N.F    | GATTCATAAAAAAATATTTGGCTTTTTTTTTTTCAGAAAAGTGG<br><b>GATGAGTAAAGGAGAAGAACTTTTC</b>    |
|                            | bar-1 gfp tag N.R    | GATAAATTTGTGTCGTCATGGTTAATAACTAGGTTCCGGATC<br><b>CAGGTCTTTGTATAGTTCATCCATGCCATG</b> |
| <i>col-19</i> (N-terminus) | col-19 gfp tag N.F   | AGGAAACGGTCACCATTTAGAAAGACATCAGTTCATCAAC<br><b>ATGAGTAAAGGAGAAGAACTTTTC</b>         |
|                            | col-19 gfp tag N.R   | ACACAAGTACTCCGCAGGATCCAACCACAATGAGCTTGCC<br><b>TTTGTATAGTTCATCCATGCCATG</b>         |
| <i>col-19</i> (C-terminus) | col-19 gfp tag C.F   | TGGATATTGTCCATGCCATCTCGTGCAGCTTACAAGGCT<br><b>AGTAAAGGAGAAGAACTTTTC</b>             |
|                            | col-19 gfp tag C.R   | AATGTTTCGAAAATTTATAAAAAAGACAGAGAAAGGCAGAAC<br><b>TATTTGTATAGTTCATCCATGCC</b>        |
| <i>daf-3</i>               | daf-3 gfp tag C.F    | GGAAGATTTTGCAAATTTGGGAATCAACGTCAGTGATGAC<br><b>AGTAAAGGAGAAGAACTTTTC</b>            |
|                            | daf-3 gfp tag C.R    | TAAATCAGTATCTAGTAGGGTGAGTGAAAAAGTTATCATC<br><b>TATTTGTATAGTTCATCCATGCC</b>          |
| <i>F56F10.3</i>            | F56F10.3 gfp tag N.F | ATTTACTATTCAATATGACAACATTCCTGTTTTTCAGAAAAAT<br><b>GAGTAAAGGAGAAGAACTTTTC</b>        |
|                            | F56F10.3 gfp tag N.R | AGATTTACGAATTTGAACAATACTGAACAAATGATATT<br><b>TTGTATAGTTCATCCATGCCATG</b>            |

|                           |                      |                                                                                      |
|---------------------------|----------------------|--------------------------------------------------------------------------------------|
| <i>fem-3</i>              | fem-3 gfp tag N.F    | GTAAAAATAAGAGAGATTTCCATTTATTTCAATTGTAAGTGT<br><b>AATGAGTAAAGGAGAAGAACTTTTC</b>       |
|                           | fem-3 gfp tag N.R    | GTTTCTCTGTCAGCTTCTACATCATCTGAACCCGGATCCAC<br><b>CTCTTTGTATAGTTCATCCATGCCATG</b>      |
| <i>hsp-16.2</i>           | hsp-16.2 gfp tag N.F | CATTTGCTCTAATTGTGAAATTAGAAATCTTCAAACATAAT<br><b>CATGAGTAAAGGAGAAGAACTTTTC</b>        |
|                           | hsp-16.2 gfp tag N.R | CAAAAACGGAACGTTGAGCTGGACGGAAATAGTGGTAAAG<br><b>TGATTTGTATAGTTCATCCATGCCATG</b>       |
| <i>ifc-2</i>              | ifc-2 gfp tag N.F    | CTTCACTTTTTATTGTTCTTTTTCTAGGGTCTCATCACAAT<br><b>GAGTAAAGGAGAAGAACTTTTC</b>           |
|                           | ifc-2 gfp tag N.R    | ATCGCTCATCGTCGGTACTAAATGGTGTGGATGTTAACGA<br><b>TTTGTATAGTTCATCCATGCCATG</b>          |
| <i>let-60</i>             | let-60 gfp tag N.F   | CATTTTTCCATATTCAACTATGCGTCTTTTTTCAGAAAAGG<br><b>GTAATGAGTAAAGGAGAAGAACTTTTC</b>      |
|                           | let-60 gfp tag N.R   | CAACTCCTCCATCTCCAACACTACCACAAGCTTGTACTCCGT<br><b>TTGTATAGTTCATCCATGCCATG</b>         |
| <i>let-756</i>            | let-756 gfp tag N.F  | CAATATTTCCAAATCATTACAATTTCTTCAAATGTTGAGATG<br><b>AATATATGAGTAAAGGAGAAGAACTTTTC</b>   |
|                           | let-756 gfp tag N.R  | GCTCCTCCGTATGAAACTATCGATGAGGCGGCAGGAACG<br><b>GCTTTGTATAGTTCATCCATGCCATG</b>         |
| <i>mab-7</i>              | mab-7 gfp tag N.F    | TTATATACTCTACAATGGTCTACAGTTCAATCAGCAAAAAA<br><b>TGAGTAAAGGAGAAGAACTTTTC</b>          |
|                           | mab-7 gfp tag N.R    | TGTTTTGTAAACTCTCAAGAAAATATTTTGATGATATTTTT<br><b>TGTATAGTTCATCCATGCCATG</b>           |
| <i>mes-6</i>              | mes-6 gfp tag N.F    | GTTTTATTTTTGTTATATATTGTTTCTTGCTTTTTCCAAAA<br><b>ACCTGAATGAGTAAAGGAGAAGAACTTTTC</b>   |
|                           | mes-6 gfp tag N.R    | CAAACCCGTGAAGATTTAATGATTTGAACTTTTTCGTGTGC<br><b>TCTTTGTATAGTTCATCCATGCCATG</b>       |
| <i>pqn-40</i>             | pqn-40 gfp tag C.F   | AAAACGAACGACTGCTAAGCCTCGTTACGTCCGTGTGCCA<br><b>AGTAAAGGAGAAGAACTTTTC</b>             |
|                           | pqn-40 gfp tag C.R   | TAAGTATTGCAGACATCATCATGGATTTTTTTGTAGATATCT<br><b>ATTTGTATAGTTCATCCATGCC</b>          |
| <i>rol-6</i>              | rol-6 gfp tag N.F    | CAATTAATAATTTCTGGATATATCTTTAGATCTAACTGAAAA<br><b>TTTCCAGATGAGTAAAGGAGAAGAACTTTTC</b> |
|                           | rol-6 gfp tag N.R    | CCAGAAAATACAATGGCGCCGGACGTCGCCGTAGTTAGG<br><b>GTTTTGTATAGTTCATCCATGCCATG</b>         |
| <i>skr-7</i>              | skr-7 gfp tag N.F    | CTATATTGATTTATATCTTTCCAGAAATCACCTAACTTTCA<br><b>AAAATGAGTAAAGGAGAAGAACTTTTC</b>      |
|                           | skr-7 gfp tag N.R    | GCCTCGTTGGCTTGAACCTTCGACGGCGGGCTTCAGCA<br><b>GATTTGTATAGTTCATCCATGCCATG</b>          |
| <i>sli-1</i>              | sli-1 gfp tag C.F    | ACCACACCACCCATACACAAATACGAACAGTGAGCGGGAG<br><b>AGTAAAGGAGAAGAACTTTTC</b>             |
|                           | sli-1 gfp tag C.R    | AATTGCAGTATAAAGCGGTAAGATGAACATTTACACAAGTC<br><b>TATTTGTATAGTTCATCCATGCC</b>          |
| <i>snr-1</i>              | snr-1 gfp tag N.F    | GTTTTCTCCCTTCAAGCCGAATCTACAGAATCAAAATTTTC<br><b>AGAATGAGTAAAGGAGAAGAACTTTTC</b>      |
|                           | snr-1 gfp tag N.R    | CTTCGGCCTCATGAAGAATCTTGATTGGGACACCAACTGA<br><b>AGTTTTGTATAGTTCATCCATGCCATG</b>       |
| <i>tra-1</i> (N-terminus) | tra-1 gfp tag N.F    | TCTCCAAATTCAACAGGAAATCAAAAACAACGAAAACGGC<br><b>GGCATGATGAGTAAAGGAGAAGAACTTTTC</b>    |
|                           | tra-1 gfp tag N.R    | GTTTTTTAATTCAAAATTCCTCGAATTAACCTCAGTACTGG<br><b>GGGCTTTGTATAGTTCATCCATGCCATG</b>     |
| <i>tra-1</i> (C-terminus) | tra-1 gfp tag C.F    | AAGGACGATTTCGGAGAATATTCCCAAAAAGCCACGTCATC<br><b>AATTTAGTAAAGGAGAAGAACTTTTCACT</b>    |
|                           | tra-1 gfp tag C.R    | CATGGTACATTAGTCATGGGAGCACACACAAAAAATGA<br><b>ATGGGGTCTCTATTTGTATAGTTCATCCATGCC</b>   |
| <i>tra-2</i>              | tra-2 gfp tag C.F    | CAAGATGAAGCACGGGAAGGCGACCTATCAGACCCAGAG<br><b>GTTAGTAAAGGAGAAGAACTTTTC</b>           |

|               |                    |                                                                                    |
|---------------|--------------------|------------------------------------------------------------------------------------|
|               | tra-2 gfp tag C.R  | GAAATGAAATTTTGGAAACCAAATTCTGAAAAAGGAAACAGA<br><b>CATTCTATTTGTATAGTTTCATCCATGCC</b> |
| <i>unc-54</i> | unc-54 gfp tag N.F | CATTAGTTTTGAGGTAGAGAAACCATTTGAAAGAAGCGAG<br><b>AAATCATGAGTAAAGGAGAAGAAGACTTTTC</b> |
|               | unc-54 gfp tag N.R | GGTACGGCGGAGATATTGCCATCCTGGGTCCTTCTCGTGC<br><b>TCTTTGTATAGTTTCATCCATGCCATG</b>     |

Core sequences with homology to *gfp* are shown in bold, sequences that are homologous to the target integration site in the worm gene are shown regular type. N-terminal targeted tag primers include the *gfp* start codon and exclude the stop codon. C-terminal targeted tag primers exclude the *gfp* start codon and include the stop codon.

**Table 5S** Universal diagnostic primers to detect presence of correct insert

| Primer name         | Sequence (5' – 3')           |
|---------------------|------------------------------|
| pCATCHR up diag.F   | AACACAGAGTAAATTCCCAAATTATTCC |
| pCATCHR down diag.R | AAGTAGTCATCAAACAGGTTTCGG     |

Corresponding gene-specific diagnostic primers are listed in **Table 6S**.

**Table 6S** Gene-specific diagnostic primers to detect presence of correct insert

| Gene            | Primer name          | Sequence (5' – 3')            |
|-----------------|----------------------|-------------------------------|
| <i>aex-3</i>    | aex-3 diag up.R      | GACGATGAAATAAAGTCCGCTGGC      |
|                 | aex-3 diag down.F    | TTCACAAAACCACCTCACAAAGTTG     |
| <i>bar-1</i>    | bar-1 diag up.R      | AATTTCTGCTAAATTGAGAAGTGC      |
|                 | bar-1 diag down.F    | GTTTCTGCTGATCTGTTCTGGTTACC    |
| <i>C02H7.1</i>  | C02H7.1 diag up.R    | ATGCTGACGGAAAAGGACTCTGC       |
|                 | C02H7.1 diag down.F  | TTCCAGCAGGAGGAGGCTGTCTGATCG   |
| <i>che-2</i>    | che-2 diag up.R      | GTAGTCTTGGTAGGATATACATCG      |
|                 | che-2 diag down.F    | TCCCACGCGATAAAGATCCACAAACC    |
| <i>col-19</i>   | col-19 diag up.R     | ATCGTTCATTAAGTCAACACGCG       |
|                 | col-19 diag down.F   | AACACTGAGTGAAAATGTCCACAGG     |
| <i>daf-3</i>    | daf-3 diag up.R      | ATCTCTGTGTGCTCATTGCATGC       |
|                 | daf-3 diag down.F    | TTCACTTTGGCAGGAATGTTTCCAGG    |
| <i>F13C5.1</i>  | F13C5.1 diag up.R    | TCATGCTCCACAAGCGGTTGAAGC      |
|                 | F13C5.1 diag down.F  | TCGAATCTTTGCTCCAGAATTTTCGG    |
| <i>F13C5.2</i>  | F13C5.2 diag up.R    | TTCCCGCCCGAGTAATTTTACAGC      |
|                 | F13C5.2 diag down.F  | GAGGCTGTTTCCAATACACAAAGTGC    |
| <i>F28C10.2</i> | F28C10.2 diag up.R   | ACATTGGAGGACACGTTGCACCCG      |
|                 | F28C10.2 diag down.F | CTGGCAAAGGTGTAATTTTCTGACC     |
| <i>F39H12.4</i> | F39H12.4 diag up.R   | GTGTTGATTCTCTGGGAGACCCC       |
|                 | F39H12.4 diag down.F | CGTTTTTCTTAATACTCCGAGCCTTC    |
| <i>F56F10.1</i> | F56F10.1 diag up.R   | GTTTTCTTCAGGCCAGCAAATCC       |
|                 | F56F10.1 diag down.F | GTCCTCTCCTTCTCTGCCTGTATATCGG  |
| <i>F56F10.3</i> | F56F10.3 diag up.R   | CAGAATTTTCTACAGTAGCAGCAGGTAG  |
|                 | F56F10.3 diag down.F | AGCTTAAAAGTAACCGTAAAAGTGGGCC  |
| <i>F56F10.4</i> | F56F10.4 diag up.R   | CAAATGGCTCTCTCGACCCATGG       |
|                 | F56F10.4 diag down.F | AGAAGTTGTTTATTCTTATTGGAGACG   |
| <i>fem-3</i>    | fem-3 diag up.R      | AGTGTGGACATTTGGAGATGGTGC      |
|                 | fem-3 diag down.F    | CATCTCAGCTTTCTACATTCATTGCC    |
| <i>gei-10</i>   | gei-10 diag up.R     | TCTTTTTAAGTGAGGGTGGGTGG       |
|                 | gei-10 diag down.F   | ATCGAAAAGTAATAGTCTGTCTGGTTTGC |
| <i>hsp-16.2</i> | hsp-16.2 diag up.R   | ATTTGTTCAAGTTGTGAGCATGGG      |
|                 | hsp-16.2 diag down.F | CCGCAAAATCTTTGTATTATAACC      |
| <i>ifc-2</i>    | ifc-2 diag up.R      | AACTTTGCTGAAACTTGACCGGG       |
|                 | ifc-2 diag down.F    | ATCACTACAAATGACCATTTTCGAGG    |
| <i>irk-2</i>    | irk-2 diag up.R      | GTTTTGTGTATGTGGGAGGAGGG       |

|                  |                                            |                                                         |
|------------------|--------------------------------------------|---------------------------------------------------------|
|                  | irk-2 diag down.F                          | AGCAATCTGTTGCTTTTCAGGTCCTCC                             |
| <i>let-60</i>    | CEOP4472 diag up.R<br>CEOP4472 diag down.F | CACACGAGTTTCTGACGTTTCACC<br>AAATATGGATGGAGTATGGACAGTCG  |
| <i>let-756</i>   | let-756 diag up.R<br>let-756 diag down.F   | AAGAATAAGAGGCAGCTGACATGG<br>GTAATCCTCAAAGGCGCAACATCG    |
| <i>mab-7</i>     | mab-7 diag up.R<br>mab-7 diag down.F       | CTTTTCATGTGGTGAACGATGACG<br>CCCGGTATTTGTATATTATCGACACG  |
| <i>mes-6</i>     | CEOP4294 diag up.R<br>CEOP4294 diag down.F | TGATTTTCGATGAGCTCCCCTTCC<br>AGAAGAAGAAGAGGAAGAGTCCATCC  |
| <i>mrp-1</i>     | mrp-1 diag up.R<br>mrp-1 diag down.F       | AGCCCATGACCATCTGTTACCC<br>TGATGGTTTGGACTTTATTTTCAGCTGC  |
| <i>nas-38</i>    | nas-38 diag up.R<br>nas-38 diag down.F     | TTTGGGCCAGGATGGCGGTGTTGG<br>GAACAACGGTAAAACACTACTATAGGC |
| <i>pqn-40</i>    | pqn-40 diag up.R<br>pqn-40 diag down.F     | GTAACCGCGAACACACATAGCGG<br>TTTTCACTACTGTCCATTTTGAGCC    |
| <i>rol-6</i>     | rol-6 diag up.R<br>rol-6 diag down.F       | TCATAACCGACTAGACTGCTTAGG<br>ATCAATGATTCTAAACTTATAGAACC  |
| <i>skr-7</i>     | skr-7 diag up.R<br>skr-7 diag down.F       | GACAATACCTGCATCGTGAGCTCC<br>AAACGTTGCAAATCTGTGAAATTGG   |
| <i>sli-1</i>     | sli-1 diag up.R<br>sli-1 diag down.F       | TTATATAACAACCAATAGGTACCG<br>TGAGGGGTAAGTACCAGTTTGTGTTGG |
| <i>snr-1</i>     | snr-1 diag up.R<br>snr-1 diag down.F       | CCTCATGATCTCTGGTTTGAATCG<br>AAAGTTGGGTACCGTTAGGAACTGG   |
| <i>T04G9.1</i>   | T04G9.1 diag up.R<br>T04G9.1 diag down.F   | TAGGAACGTGCGAAAGATTCACG<br>TTTTACGAGCCACTCCGTTGTAAGTACC |
| <i>T19D7.3</i>   | T19D7.3 diag up.R<br>T19D7.3 diag down.F   | ATTTGCTTTTGCAGCCAATACG<br>TCGGCTTTACAGTTTGCACATCC       |
| <i>tra-1</i>     | tra-1 diag up.R<br>tra-1 diag down.F       | GATACAGTACCCCAAGACGC<br>CCGAAAGAACAGAATTATGACG          |
| <i>tra-2</i>     | CEOP2268 diag up.R<br>CEOP2268 diag down.F | CTGGGCAATTCGTTCTTGATAGC<br>AGGTAGGTAGGAAGTTTACCTGCTGG   |
| <i>unc-54</i>    | unc-54 diag up.R<br>unc-54 diag down.F     | CAGAAGTTGCATTATATTGAAGGG<br>AAAGAGCACCCATGACAAACAAAGG   |
| <i>Y87G2A.10</i> | CEOP1708 diag up.R<br>CEOP1708 diag down.F | AAAATTGGCAACCGACCAATACG<br>GAATCGGCAATCTTCTCGAATTGTGC   |

**Table 7S** Universal diagnostic primers to detect presence of GF-URA3-FP and reconstituted *gfp*

| Primer name                             | Sequence (5' – 3')      |
|-----------------------------------------|-------------------------|
| <i>gfp</i> tag diag.F <sup>a</sup>      | GGCAGACAAACAAAAGAATGG   |
| <i>gfp</i> tag diag.R <sup>a</sup>      | GAAAGTAGTGACAAGTGTGGC   |
| <i>gfp</i> loop out diag.F <sup>b</sup> | GCACTACTGGAAAACACTACCTG |
| <i>gfp</i> loop out diag.R <sup>b</sup> | CCATTCTTTTGTGTTGTCTGCC  |

Corresponding gene-specific diagnostic primers are listed in **Table 8S**.

<sup>a</sup>Primers to detect the presence of GF-URA3-FP. The primer *gfp* tag diag.F binds the GF-URA3-FP sequence downstream of the direct repeats ('F') in the tag, and corresponding gene-specific reverse primers bind to the worm target region downstream of the tag insertion site. The primer *gfp* tag diag.R binds the GF-URA3-FP sequence upstream of 'F' in the tag, and corresponding gene-specific forward primers bind to the worm target region upstream of the tag insertion site.

<sup>b</sup>Primers to detect reassembly of the *gfp* tag. The primer *gfp* loop-out diag.F binds the *gfp* sequence in a region upstream of 'F' in the tag. The primer *gfp* loop-out diag.R binds the *gfp* sequence in a region downstream of 'F' in the tag. The gene-specific primers are the same as those used to detect the presence of the GF-URA3-FP tag.

**Table 8S** Gene-specific diagnostic primers to detect presence of GF-URA3-FP and reconstituted *gfp*

| <b>Gene</b>                | <b>Primer name</b>           | <b>Sequence (5' – 3')</b>  |
|----------------------------|------------------------------|----------------------------|
| <i>aex-3</i>               | <i>aex-3 gfp diag N.R</i>    | AGTAGTACATCCTTCCGGTTGGC    |
| <i>bar-1</i>               | <i>bar-1 gfp diag N.R</i>    | GCCTCTGATAAATTTGTGTCC      |
| <i>col-19</i> (N-terminus) | <i>col-19 gfp diag N.R</i>   | GGGTGATAGCCTGAACACAAAG     |
| <i>col-19</i> (C-terminus) | <i>col-19 gfp diag C.R</i>   | GCCAGATTTGAAAAGCTGAAG      |
| <i>daf-3</i>               | <i>daf-3 gfp diag C.R</i>    | GGGATACATTGTCCCTTCTATACAGC |
| <i>F56F10.3</i>            | <i>F56F10.3 gfp diag N.R</i> | GCTTTTGTATGAAGCCATCAGC     |
| <i>fem-3</i>               | <i>fem-3 gfp diag N.R</i>    | CGTCGAATCTTCTCATTGTGC      |
| <i>hsp-16.2</i>            | <i>hsp16.2 gfp diag N.R</i>  | CTGTGAGACGTTGAGATTGATGG    |
| <i>ifc-2</i>               | <i>ifc-2 gfp diag N.R</i>    | ATTGGTATACCCACTGTATCGC     |
| <i>let-60</i>              | <i>let-60 gfp diag N.R</i>   | AGCACGATTTATTCGTCTTTGG     |
| <i>let-756</i>             | <i>let-756 gfp diag N.R</i>  | GAGTACATATAGCTTGAACCTCC    |
| <i>mab-7</i>               | <i>mab-7 gfp diag N.R</i>    | CTGATTGCATAACGGCTTATGG     |
| <i>mes-6</i>               | <i>mes-6 gfp diag N.R</i>    | GCTTGTTCCCTCATCTATTCTGTC   |
| <i>pqn-40</i>              | <i>pqn-40 gfp diag C.R</i>   | GTTCCCAAATGCATTAATGTGG     |
| <i>rol-6</i>               | <i>rol-6 gfp diag N.R</i>    | ATGGGTTTGGAGTTGGTGCTGG     |
| <i>skr-7</i>               | <i>skr-7 gfp diag N.R</i>    | GTTTCTCACACCACTCAATGACC    |
| <i>sli-1</i>               | <i>sli-1 gfp diag C.R</i>    | CTCCGTAAAATCTGGGACAGCG     |
| <i>snr-1</i>               | <i>snr-1 gfp diag N.R</i>    | TTCCTCGGTAAACTTCGCCTGG     |
| <i>tra-1</i> (N-terminus)  | <i>tra-1 gfp diag N.R</i>    | TTACACACTGATCGACAAGCTCC    |
| <i>tra-1</i> (C-terminus)  | <i>tra-1 gfp diag C.F</i>    | AGACATCCTCATTCTCGTCGTGG    |
| <i>tra-2</i>               | <i>tra-2 gfp diag C.F</i>    | ATCACATTACCGAGCGTACACCACC  |
| <i>unc-54</i>              | <i>unc-54 gfp diag N.R</i>   | CACCTCCAAAACCTGCTCTCTGG    |
